# Supplementary material
Source: Elsevier journal article supplement (https://www.sciencedirect.com/science/article/pii/S0211139X10000764)
Supplement: mmc1 [file S0211139X10000764:mmc1.pdf]

**ANEXO 2.****FORMULARIO DE EVALUACIÓN DE TRABAJO SOCIAL (FETS)**

Fecha:

|  |  |
|--|--|
|  |  |
|--|--|

Nombre del EVALUADOR

|  |
|--|
|  |
|--|

Nombre de la PERSONA MAYOR

Edad: \_\_\_\_\_ años

Fecha de la primera visita (aa / mm / dd):

|                                                                                                        |
|--------------------------------------------------------------------------------------------------------|
|                                                                                                        |
| Lugar de la entrevista: <input type="checkbox"/> Domicilio <input type="checkbox"/><br>Centro de salud |
| Hora inicio entrevista:                                                                                |

El instrumento tiene como objetivo detectar la sospecha de maltrato a personas mayores en el ámbito doméstico, donde el posible responsable del maltrato puede ser un familiar, un vecino, un amigo, un cuidador remunerado o formal.

NOTA PARA EL PROFESIONAL: “Para intentar que pueda responder libremente, se intentará que la persona mayor esté sola en la consulta, sin la presencia de ninguna otra persona allegada, por ejemplo, un familiar, amigo, vecino, etc. Por ejemplo se podría decir a la persona que le acompaña “Debido a que el estudio solicita que estas preguntas se hagan en privado, ¿podría por favor dejarnos a solas un momento?”. Si la persona que acompaña a la persona mayor no se marcha, las preguntas se formulan de todos modos pero se informa de esta presencia al final de la aplicación del instrumento.”.

**SECCIÓN 1: HISTORIA SOCIAL (ocupación, matrimonio, divorcio, desgracia o acontecimiento negativo, educación, inmigración, traslados, otros acontecimientos importantes).**

*En esta sección, sugiera al paciente que le cuente su historia personal. Durante el proceso, reúna información sobre lo que antecede y vaya reflejándola más abajo:*

**1. Situación ocupacional (trace un círculo alrededor de lo que proceda)**

1. Jubilado      ¿Tipo de trabajo desempeñado? :
2. Tareas domésticas
3. Otro:

**2. Vivienda**

1. Casa / apartamento [   ]
2. Vivienda de bajo costo / habitación de alquiler moderado [   ]
3. Vivienda pública / residencia de larga duración [   ]
4. Viviendas tuteladas [   ]
  - Con servicios [   ]
  - Sin servicios [   ]
5. Otra (especifíquese):

¿Existen dificultades o problemas específicos identificados por el paciente con respecto a las condiciones de la vivienda (salubridad, espacio, seguridad, satisfacción...)?

☐ Sí      ☐ No      ☐ No aplicable      ☐ Resistencia a responder

En caso de respuesta afirmativa. Detallar:

**3. Con quién convive (marque todo lo que proceda):**

- ☐ Sólo
- ☐ Con el cónyuge o pareja
- ☐ Con un compañero de habitación
- ☐ Con hijo(s)    ¿Cuántos? : \_\_\_\_\_ hijos
- ☐ Con nieto(s)    ¿Cuántos? : \_\_\_\_\_ nietos
- ☐ Con otros familiares: \_\_\_\_\_ (determinar)
- ☐ Con un cuidador pagado
- ☐ Otra forma: \_\_\_\_\_ (determinar)

- ¿Cuánto tiempo ha permanecido en la forma de convivencia actual? \_\_\_\_\_
- ¿Esta situación supone un problema (por ejemplo: problemas familiares, necesidad de mayor cantidad de ayuda, otros)?

☐ Sí      ☐ No      ☐ No aplicable      ☐ Resistencia a responder

En caso de respuesta afirmativa. Detallar:

**4. Describa los acontecimientos más importantes (o sucesos vitales) vividos en los últimos 12 meses (trace un círculo alrededor de todo lo que proceda)**

1. Ninguno
2. Fallecimiento
3. Divorcio (propio o en la familia) / separación de la pareja
4. Deterioro físico de la persona mayor o de la persona con quien convive
5. Cambio en la situación financiera
6. Hijos o nietos que se trasladan o se marchan de casa.
7. Trasladarse o marcharse de la casa de un hijo o de otro familiar
8. Otro (especifíquese):

Detallar:

**5. En la actualidad, ¿cómo considera usted su salud?**

☐ Excelente    ☐ Buena    ☐ Regular    ☐ Mala    ☐ Muy mala

## SECCIÓN 2: DINÁMICA FAMILIAR

### RELACIÓN CON EL CÓNYUGE / LA PAREJA

#### 6. En el caso de que esté casado, ¿es este el primer matrimonio?

*(Aplique la misma pregunta en el caso tiene pareja de hecho o relación estable)*

1. Sí                      ¿Desde cuándo? :
2. No                    ¿Cuánto tiempo hace que tiene la relación actual? :
3. No aplicable      *(Vaya a la pregunta 8)*
4. Resistencia a responder

#### 7. La mayoría de las parejas reconocen que, de vez en cuando, surgen problemas en su relación. ¿Con qué frecuencia estima que se producen estos problemas en la suya y utilizando la siguiente escala?:

- ☐ Nunca    ☐ Ocasionales/esporádicos    ☐ Frecuentes/A menudo    ☐ Muy frecuentes

Detallar:

- ♦ ¿Su cónyuge o pareja tiene algún problema concreto de salud o de tipo emocional (como, por ejemplo, enfermedad, discapacidad, abuso —del alcohol, de la droga o del juego— o trastorno mental)?

- ☐ Sí                      ☐ No                      ☐ No aplicable                      ☐ Resistencia a responder

En caso de respuesta afirmativa. Detallar:

En caso de respuesta afirmativa, describa el impacto que este problema ha tenido sobre la persona mayor:

- ♦ *Si procede, investigue las siguientes preguntas:*
  - ¿Cómo influyen estos problemas en su relación?
  - ¿Desde cuándo vienen ocurriendo estos problemas?
  - ¿Diría que usted está siendo maltratado en esta relación?

- ☐ Sí                      ☐ No                      ☐ No aplicable                      ☐ Resistencia a responder

En caso de respuesta afirmativa. Detallar:

- ¿Hay algo que provoque estos problemas?

- ☐ Sí                      ☐ No                      ☐ No aplicable                      ☐ Resistencia a responder

En caso de respuesta afirmativa. Detallar:

- ¿Han empeorado las cosas en los últimos 12 meses?

- ☐ Sí                      ☐ No                      ☐ No aplicable                      ☐ Resistencia a responder

En caso de respuesta afirmativa. Detallar:

### RELACIÓN CON LOS HIJOS

#### 8. ¿Tiene algún hijo?

☐ Sí ☐ No ☐ No aplicable ☐ Resistencia a responder

- En caso de respuesta negativa, vaya a la pregunta 10.
- En caso de respuesta afirmativa, ¿cuántos hijos tiene? \_\_\_\_\_
- Explore la relación entre el paciente y el hijo o los hijos. Si hay problemas, ¿con quién?  
Señale con qué hijos tiene problemas A:  
B:  
C:  
D:

Describa cualquier problema que tenga con ellos:

#### 9. ¿Alguno de los hijos tiene algún problema concreto de salud o de tipo emocional (como, por ejemplo, enfermedad, discapacidad, abuso —del alcohol, de la droga o del juego— o trastorno mental)?

☐ Sí ☐ No ☐ No aplicable ☐ Resistencia a responder

En caso de respuesta afirmativa. Detallar:

En caso de respuesta afirmativa, describa el impacto que estos problemas han tenido sobre la persona mayor:

¿Esta persona vive con el paciente?

☐ Sí ☐ No ☐ No aplicable ☐ Resistencia a responder

### RELACIÓN CON LOS NIETOS

#### 10. ¿Tiene nietos?

☐ Sí ☐ No ☐ No aplicable ☐ Resistencia a responder

- En caso de respuesta negativa, vaya a la pregunta 12.
- En caso de respuesta afirmativa, ¿cuántos nietos tiene? \_\_\_\_\_
- Explore la relación entre el paciente y el nieto o los nietos. Si hay problemas, ¿con quién?  
Señale con qué nietos tiene problemas A:  
B:  
C:  
D:

Describa cualquier problema que tenga con ellos:

**11. ¿Alguno de los nietos tiene algún problema concreto de salud o de tipo emocional (como, por ejemplo, enfermedad, discapacidad, abuso —del alcohol, de la droga o del juego— o trastorno mental)?**

☐ Sí ☐ No ☐ No aplicable ☐ Resistencia a responder

En caso de respuesta afirmativa. Detallar:

En caso de respuesta afirmativa, describa el impacto que estos problemas han tenido sobre la persona mayor:

- ¿Esta persona vive con el paciente?
- ☐ Sí ☐ No ☐ No aplicable ☐ Resistencia a responder

|                                                                                             |
|---------------------------------------------------------------------------------------------|
| <b>RELACIÓN CON OTROS MIEMBROS DE LA FAMILIA, AMIGOS, VECINOS, CUIDADOR PAGADO O FORMAL</b> |
|---------------------------------------------------------------------------------------------|

**12. ¿Hay algún otro miembro de la familia, amigo, vecino, cuidador formal con quien haya tenido problemas en los últimos 12 meses?**

☐ Sí ☐ No ☐ No aplicable ☐ Resistencia a responder

- En caso de respuesta afirmativa, ¿Con quién ha tenido esos problemas?
  - ¿Qué problemas ha tenido?
  - ¿Con qué frecuencia se han producido esos problemas?
- ☐ Una ocasión ☐ Algunas veces ☐ Bastantes veces ☐ Muchas veces

**13. ¿Algún otro miembro de la familia, amigo, vecino o su cuidador pagado o formal, tiene algún problema concreto de salud o de tipo emocional (como, por ejemplo, enfermedad, discapacidad, abuso —del alcohol, de la droga o del juego— o trastorno mental)?**

☐ Sí ☐ No ☐ No aplicable ☐ Resistencia a responder

En caso de respuesta afirmativa. Detallar:

En caso de respuesta afirmativa, describa el impacto que estos problemas han tenido sobre la persona mayor:

- ¿Esta persona vive con el paciente?
- ☐ Sí ☐ No ☐ No aplicable ☐ Resistencia a responder

### SECCIÓN 3: PREGUNTAS ACERCA DE LAS ACTIVIDADES DE LA VIDA DIARIA

#### GRADO DE DEPENDENCIA

#### 14. La persona mayor es:

1. Independiente en todas las actividades de la vida diaria *Vaya a la pregunta 19*
2. Independiente en algunas actividades de la vida diaria
3. Completamente dependiente
4. (Si es aplicable) ¿Cuántas personas le proporcionan ayuda?

Haga una lista de las personas que le ayudan y del grado de parentesco que tiene con ellas:

A:

B:

C:

D:

En esta sección, use las categorías enumeradas anteriormente para ayudarle a completar la tabla.

Las personas mayores pueden tener diferentes cuidadores para diferentes tareas.

#### Grado de ayuda

1. Sin ayuda
2. Con la ayuda de otros
3. Completamente dependiente de otros
4. Actividad no realizada

| Actividad                      | Grado de ayuda<br>(de 1 a 4) | Para cada ítem, indique si la situación es<br><u>T</u> emporal o<br><u>P</u> ermanente | ¿Quién lleva a cabo la actividad)<br>(véanse de A a D, anteriores) | ¿Se siente satisfecho con el cuidado recibido |    | ¿Vive la persona mayor con el cuidador? |
|--------------------------------|------------------------------|----------------------------------------------------------------------------------------|--------------------------------------------------------------------|-----------------------------------------------|----|-----------------------------------------|
|                                |                              |                                                                                        |                                                                    | SÍ                                            | NO |                                         |
| Bañarse                        |                              |                                                                                        |                                                                    |                                               |    |                                         |
| Administración de medicamentos |                              |                                                                                        |                                                                    |                                               |    |                                         |
| Tareas domésticas              |                              |                                                                                        |                                                                    |                                               |    |                                         |
| Preparación de la comida       |                              |                                                                                        |                                                                    |                                               |    |                                         |
| Comer                          |                              |                                                                                        |                                                                    |                                               |    |                                         |
| Ir a comprar                   |                              |                                                                                        |                                                                    |                                               |    |                                         |
| Transporte                     |                              |                                                                                        |                                                                    |                                               |    |                                         |
| Movilidad                      |                              |                                                                                        |                                                                    |                                               |    |                                         |
| Otra                           |                              |                                                                                        |                                                                    |                                               |    |                                         |

**15. Pregunte directamente a la persona mayor acerca del tipo de cuidados que recibe y la relación con la persona que le ayuda:**

- ¿Ha habido algún problema con el tipo de cuidados que ha recibido en los últimos 12 meses?

☐ Sí ☐ No ☐ No aplicable ☐ Resistencia a responder

Detallar:

- ¿Con qué frecuencia diría que se han producido tales problemas?

☐ Una sola vez ☐ Algunas veces ☐ Mensualmente ☐ Semanalmente

Detallar:

- ¿Cree que en alguna ocasión se le ha privado de cosas que necesitaba? (Por ejemplo: equipamiento de la casa, alimentos, visitas al médico, dentadura postiza, etc.).

☐ Sí ☐ No ☐ No aplicable ☐ Resistencia a responder

En caso de respuesta afirmativa. Detallar:

- ¿Alguna vez se ha comportado con usted la/s persona/s que le presta cuidados de alguna forma que le haya molestado?

☐ Sí ☐ No ☐ No aplicable ☐ Resistencia a responder

- ¿Se han producido discusiones entre usted y esa/s persona/s?

☐ Sí ☐ No ☐ No aplicable ☐ Resistencia a responder

- ¿Le ha tratado alguna vez de forma brusca esa/s persona/s?

☐ Sí ☐ No ☐ No aplicable ☐ Resistencia a responder

- ¿Dispone de la comida que quiere?

☐ Sí ☐ No ☐ No aplicable ☐ Resistencia a responder

- Respecto a calidad de comida

☐ Sí ☐ No ☐ No aplicable ☐ Resistencia a responder

- Respecto a cantidad de comida

☐ Sí ☐ No ☐ No aplicable ☐ Resistencia a responder

- ¿Alguna vez, durante un día o más, no haya tenido comida suficiente?

☐ Sí ☐ No ☐ No aplicable ☐ Resistencia a responder

- ¿Se ha negado alguna vez esa persona a llevarle de compras?

☐ Sí ☐ No ☐ No aplicable ☐ Resistencia a responder

- ¿Alguna vez le han hecho sentir que no valía para nada o que era una carga?

☐ Sí ☐ No ☐ No aplicable ☐ Resistencia a responder

En caso de respuesta afirmativa. Detallar:

- A la hora de pedir cosas que quiere o necesita, ¿se muestra reacio a pedirlo o tiene temor de hacerlo?

☐ Sí ☐ No ☐ No aplicable ☐ Resistencia a responder

En caso de respuesta afirmativa. Detallar:

**16. ¿Tiene alguna preocupación con respecto a**

1. estar seguro de que siempre tendrá ayuda disponible?

☐ Sí ☐ No ☐ No aplicable ☐ Resistencia a responder

2. la calidad de los cuidados que recibe?

☐ Sí ☐ No ☐ No aplicable ☐ Resistencia a responder

3. sentirse en deuda con la persona que le proporciona los cuidados?

☐ Sí ☐ No ☐ No aplicable ☐ Resistencia a responder

4. alguna otra cosa?

☐ Sí ☐ No ☐ No aplicable ☐ Resistencia a responder

En caso de respuesta afirmativa. Detallar:

**17. Antes de necesitar algún tipo de ayuda, ¿ha habido problemas en su relación con alguna de las personas que le cuidan?**

☐ Sí ☐ No ☐ No aplicable ☐ Resistencia a responder

En caso de respuesta afirmativa. Detallar:

**18. ¿Alguno de los cuidadores tiene algún problema concreto de salud o de tipo emocional (como, por ejemplo, enfermedad, discapacidad, abuso —del alcohol, de la droga o del juego— o trastorno mental)?**

☐ Sí ☐ No ☐ No aplicable ☐ Resistencia a responder

¿Quién? \_\_\_\_\_

En caso de respuesta afirmativa. Detallar:

En caso de respuesta afirmativa, describa el impacto que estos problemas han tenido sobre la persona mayor:



#### SECCIÓN 4: ESTADO FÍSICO Y MENTAL

**19. ¿Toma algún medicamento?**

☐ Sí ☐ No ☐ No aplicable ☐ Resistencia a responder

**20. ¿Sabe para qué toma cada medicamento?**

☐ Sí ☐ No ☐ No aplicable ☐ Resistencia a responder

**21. En los últimos 12 meses, ¿ha aumentado su consumo de medicamentos?**

☐ Sí ☐ No ☐ No aplicable ☐ Resistencia a responder

En caso de respuesta afirmativa. Detallar:

**22. ¿Consume alcohol?**

☐ Sí ☐ No ☐ No aplicable ☐ Resistencia a responder

**23. En los últimos 12 meses, ¿ha aumentado su consumo de alcohol?**

☐ Sí ☐ No ☐ No aplicable ☐ Resistencia a responder

**24. En los últimos 12 meses, ¿ha aumentado su nivel de tristeza o depresión?**

☐ Sí ☐ No ☐ No aplicable ☐ Resistencia a responder

En caso de respuesta afirmativa. Detallar:

**25. En los últimos 12 meses, ¿ha consultado o ha sido remitido a un psicólogo, a un trabajador social, a un psiquiatra o a cualquier otro tipo de profesional?**

☐ Sí ☐ No ☐ No aplicable ☐ Resistencia a responder

En caso de respuesta afirmativa. Detallar:

## SECCIÓN 5: VIVIR CON UNA PERSONA A LA QUE TIENE QUE CUIDAR

### 26. ¿Vive con alguien que dependa de usted?

☐ Sí ☐ No ☐ No aplicable ☐ Resistencia a responder

- En caso de respuesta negativa, vaya a la pregunta 28.
- En caso de respuesta afirmativa, ¿cuál es su relación con esta persona? \_\_\_\_\_
- ¿Qué tipo de ayuda le proporciona usted a esta persona?

**Sí**

**No**

**N/A = No aplicable**

**R = Resistencia a responder**

|                                 | Sí | No | N/A | R |
|---------------------------------|----|----|-----|---|
| Baño                            |    |    |     |   |
| Vestido                         |    |    |     |   |
| Aseo                            |    |    |     |   |
| Administración de la medicación |    |    |     |   |
| Tareas domésticas               |    |    |     |   |
| Preparación de comida           |    |    |     |   |
| Comer                           |    |    |     |   |
| Comprar                         |    |    |     |   |
| Transporte                      |    |    |     |   |
| Movilidad                       |    |    |     |   |
| Otra (describase):              |    |    |     |   |

- En caso de respuesta afirmativa a alguna de las cuestiones anteriores, ¿existe algún problema entre usted y esta persona?

☐ Sí ☐ No ☐ No aplicable ☐ Resistencia a responder

Detallar:

### 27. ¿Alguna vez le ha amenazado esta persona o se ha mostrado agresiva con usted? (de forma intencional o no intencional)

☐ Sí ☐ No ☐ No aplicable ☐ Resistencia a responder

En caso de respuesta afirmativa. Detallar:

## SECCIÓN 6: FAMILIA Y ACTIVIDADES SOCIALES

### 28. ¿Participa en actividades sociales?

☐ Sí ☐ No ☐ No aplicable ☐ Resistencia a responder

En caso de respuesta afirmativa. Detallar:

- ¿Cree que tiene suficiente contacto con sus hijos, familiares, amigos, vecinos, etc.?

☐ Sí ☐ No ☐ No aplicable ☐ Resistencia a responder

En caso de respuesta negativa. Detallar

- ¿Participa en actividades familiares con tanta frecuencia como le gustaría?

☐ Sí ☐ No ☐ No aplicable ☐ Resistencia a responder

¿Participa en actividades sociales con tanta frecuencia como le gustaría?

☐ Sí ☐ No ☐ No aplicable ☐ Resistencia a responder

En caso de respuesta negativa. Detallar:

- En caso de respuesta negativa, ¿qué se lo impide?

☐ La salud

☐ No hay nadie que le lleve

☐ Accesibilidad insuficiente a las actividades en las que me gustaría participar

☐ Es demasiado caro

☐ Otras

Detallar:

- ¿Alguna vez alguien cercano a usted le ha impedido participar en actividades sociales?

☐ Sí ☐ No ☐ No aplicable ☐ Resistencia a responder

En caso de respuesta afirmativa. Detallar:

## SECCIÓN 7 A: DEPENDENCIA ECONÓMICA DE LA PERSONA MAYOR

### 29. ¿Cómo cree que es su situación económica?

1. Económicamente autosuficiente
2. Parcialmente autosuficiente
3. Total dependencia económica
4. La desconozco

Detallar:

### 30. ¿Quién administra sus recursos económicos?

1. Yo mismo
2. Tengo alguna ayuda
3. Otros
4. Lo desconozco

### 31. En caso de respuesta afirmativa a las preguntas 30.2 ó 30.3", ¿cuál es su relación con esa persona?

1. Cónyuge / pareja de hecho
  2. Hijo(s) ¿Cuántos le ayudan o administran sus recursos económicos? :
  3. Nieto(s) ¿Cuántos le ayudan o administran sus recursos económicos? :
  4. Sobrina / sobrino ¿Cuántos le ayudan o administran sus recursos económicos? :
  5. Amigo(s) ¿Cuántos le ayudan o administran sus recursos económicos? :
  6. Otra persona \_\_\_\_\_
- ¿Quién es el responsable de pagar su alquiler (hipoteca o impuestos sobre bienes inmuebles)? :
  - ¿Alguna vez ha existido algún problema entre usted y la persona que administra sus recursos económicos?

☐ Sí ☐ No ☐ No aplicable ☐ Resistencia a responder

En caso de respuesta afirmativa. Detallar:

### 32. ¿Alguna persona tiene un poder notarial bancario?

☐ Sí ☐ No ☐ No aplicable ☐ Resistencia a responder

En caso de respuesta afirmativa, ¿alguna vez ha existido algún problema con esta persona?

### 33. ¿Alguna persona tiene un poder notarial total?

☐ Sí ☐ No ☐ No aplicable ☐ Resistencia a responder

En caso de respuesta afirmativa, ¿alguna vez ha existido algún problema con esta persona?

### 34. ¿Alguna vez ha firmado documentos y ha sentido que le estaban obligando a firmarlos?

☐ Sí ☐ No ☐ No aplicable ☐ Resistencia a responder

En caso de respuesta afirmativa, ¿cuál fue su relación con la persona que le obligó a firmar?  
Señale las consecuencias de ese hecho

**35. Formule estas preguntas SÓLO a las personas mayores que reciben ayuda para administrar sus recursos económicos o cuyos recursos han sido administrados por otra persona (incluidos quienes han concedido poderes notariales):**

- ¿Está informado de todas las gestiones que se hacen con su dinero y recursos económicos?

☐ Sí ☐ No ☐ No aplicable ☐ Resistencia a responder

En caso de respuesta negativa, ¿esto supone un problema para usted?

☐ Sí ☐ No ☐ No aplicable

- ¿Alguna vez se ha preocupado o ha sospechado de que su dinero no estaba siendo administrando como usted quería?

☐ Sí ☐ No ☐ No aplicable ☐ Resistencia a responder

- ¿Esto ha ocurrido en los últimos 12 meses?

☐ Sí ☐ No ☐ No aplicable ☐ Resistencia a responder

- ¿Cree que su saldo bancario es tal y como debería ser?

☐ Sí ☐ No ☐ No aplicable ☐ Resistencia a responder

- ♦ En caso de respuesta negativa, ¿este problema se ha producido en los últimos 12 meses?

☐ Sí ☐ No ☐ No aplicable ☐ Resistencia a responder

- ¿Alguna vez han utilizado su dinero sin su consentimiento?

☐ Sí ☐ No ☐ No aplicable ☐ Resistencia a responder

- ♦ En caso de respuesta afirmativa, ¿esta situación se ha producido en los últimos 12 meses?

☐ Sí ☐ No ☐ No aplicable ☐ Resistencia a responder

- ¿Se pagan regularmente todas sus facturas?

☐ Sí ☐ No ☐ No aplicable ☐ Resistencia a responder

- ♦ En caso de respuesta negativa, ¿esta situación se ha producido en los últimos 12 meses?

☐ Sí ☐ No ☐ No aplicable ☐ Resistencia a responder

- Si se ha identificado algún problema en cualquiera de las preguntas precedentes, ¿con qué frecuencia se han producido este tipo de situaciones en los últimos 12 meses?

☐ Una sola vez ☐ Algunas veces ☐ Mensualmente ☐ Semanalmente

Explicación de los problemas mencionados

**36. En general, ¿cree que alguien anda detrás de su dinero?**

☐ Sí ☐ No ☐ No aplicable ☐ Resistencia a responder

En caso de respuesta afirmativa. Detallar:

## SECCIÓN 7 B: DEPENDENCIA ECONÓMICA DE ALGUIEN SOBRE LA PERSONA MAYOR

**37. En los últimos 12 meses, ¿ha dependido alguna persona de su dinero?**  
☐ Sí ☐ No ☐ No aplicable ☐ Resistencia a responder

- En caso de respuesta negativa, vaya a la pregunta 43.

En caso de respuesta afirmativa, ¿quién?

- ☐ Cónyuge / pareja de hecho
- ☐ Hijo(s)
- ☐ Hija(s)
- ☐ Nieto(s)
- ☐ Sobrina(s)
- ☐ Sobrino(s)
- ☐ Otra persona:

- ¿Alguna de las personas anteriores administra también sus recursos económicos?

☐ Sí ☐ No ☐ No aplicable ☐ Resistencia a responder

♦ En caso de respuesta afirmativa, ¿quién? \_\_\_\_\_

**38. ¿Vive esa persona con usted?**  
☐ Sí ☐ No ☐ A veces ☐ No aplicable ☐ Resistencia a responder

**39. ¿Hasta qué punto esa persona depende de usted económicamente?**

1. Totalmente
2. Parcialmente
3. Ocasionalmente

- ¿Esta situación es ☐ permanente? ☐ temporal?

Explicación (por ejemplo: actualmente en situación de desempleo, ingresos insuficientes, discapacidad, otro motivo):

**40. ¿Esta persona tiene algún problema concreto de salud o de tipo emocional (como, por ejemplo, enfermedad, discapacidad, abuso —del alcohol, de la droga o del juego— o enfermedad mental)?**

☐ Sí ☐ No ☐ No aplicable ☐ Resistencia a responder

En caso de respuesta afirmativa. Detallar:

**41. ¿Alguna vez ha existido algún problema con respecto a los recursos económicos entre usted y esa persona?**

☐ Sí ☐ No ☐ No aplicable ☐ Resistencia a responder

En caso de respuesta afirmativa. Detallar:

**42. ¿Esta persona le ha maltratado alguna vez, de forma intencional o no intencional?**

☐ Sí ☐ No ☐ No aplicable ☐ Resistencia a responder

En caso de respuesta afirmativa. Detallar:

- ¿Persiste todavía este problema?

☐ Sí ☐ No ☐ No aplicable ☐ Resistencia a responder

Detallar:

## SECCIÓN 8: RESUMEN DE LAS PREGUNTAS FORMULADAS A LA PERSONA MAYOR

*El entrevistador indica: “Estamos a punto de acabar las preguntas y me gustaría repasar algunas cuestiones más”*

**43. ¿Ha habido momentos en los que se haya sentido atemorizado o amenazado por alguna persona cercana a usted?**

1. No
2. Sí, ya mencionado
3. Sí, no mencionado; explicar quién y la situación:
4. En caso de respuesta afirmativa la pregunta 43.3, ¿esto ha ocurrido en los últimos 12 meses?

☐ Sí ☐ No ☐ No aplicable ☐ Resistencia a responder

En caso de respuesta negativa a la pregunta 43.4 ¿cuándo ocurrió?

**44. ¿Cree que alguien cercano a usted le maltrata de alguna forma, ya sea de forma intencional o no?**

1. No (vaya a la pregunta 45)
2. Sí, ya mencionado
3. Sí, no mencionado; explicar quién y la situación:
4. En caso de respuesta afirmativa a la pregunta 44.3, ¿esto ha ocurrido en los últimos 12 meses?

☐ Sí ☐ No ☐ No aplicable ☐ Resistencia a responder

En caso de respuesta negativa a la pregunta 44.4, ¿cuándo ocurrió? :

**45. ¿Alguna vez ha sentido que alguien cercano a usted estaba haciéndole daño emocional, físico (por ejemplo, golpeándole o tratarle bruscamente), sexual o económico, o siendo negligente y descuidando sus necesidades básicas, ya sea de forma intencional o no intencional?**

1. No (vaya a la pregunta 46)
2. Sí, ya mencionado
3. Sí, no mencionado; explicar quién y qué situación :
4. En caso de respuesta afirmativa a la pregunta 45.3, ¿esto ha sucedido durante los últimos 12 meses?

☐ Sí ☐ No ☐ No aplicable ☐ Resistencia a responder

En caso de respuesta negativa a la pregunta 45.4, ¿cuándo ocurrió?

**46. En general, ¿está satisfecho con la relación que mantiene con las personas que están cerca de usted?**

☐ Sí ☐ No ☐ No aplicable ☐ Resistencia a responder

**47. ¿Hay algo que le gustaría añadir que no haya sido mencionado antes?**

☐ Sí ☐ No ☐ No aplicable ☐ Resistencia a responder

En caso de respuesta afirmativa. Detallar:

## SECCIÓN 9: PREGUNTAS PARA EL EVALUADOR

**48. ¿Le fue posible entrevistar al paciente en privado?**

☐ Sí ☐ No ☐ No aplicable

En caso de respuesta negativa, ¿quién estaba presente y por qué? :

**49. ¿Cree que la persona mayor se ha mostrado abierto y sincero con usted durante la evaluación?**

☐ Sí ☐ No ☐ No aplicable

En caso de respuesta negativa, detallar:

**50. ¿La persona mayor fue capaz de participar plenamente en la entrevista?**

☐ Sí ☐ No ☐ No aplicable

En caso de respuesta negativa, incluya la explicación (dificultad de entendimiento, problemas auditivos, falta de cooperación, etc.):

**51. Durante la entrevista, ¿observó en el paciente alguno de los siguientes estados afectivos? Marque todos los que procedan:**

- ☐ Agresividad
- ☐ Ansiedad
- ☐ Vergüenza
- ☐ Depresión
- ☐ Miedo
- ☐ Impotencia
- ☐ Ira
- ☐ Tristeza
- ☐ Otros:

Comentario:

**52. ¿Observó algún signo de abuso, negligencia o maltrato? (Por ejemplo, que estuviese mal atendido, casa desordenada, falta de alimentos, olor a orina, algún moratón visible e inexplicable, u otro signo)**

☐ Sí ☐ No ☐ No aplicable

En caso de respuesta afirmativa. Detallar:

**53. ¿Cree que este paciente está siendo maltratado?**

1. Sí
2. No
3. No lo sé

Explique su respuesta:

**54. En caso de respuesta afirmativa a la pregunta 53, ¿el paciente**

- [ ] declaró específicamente que había sido maltratado?
- [ ] utilizó palabras para describir el maltrato?

Detallar:



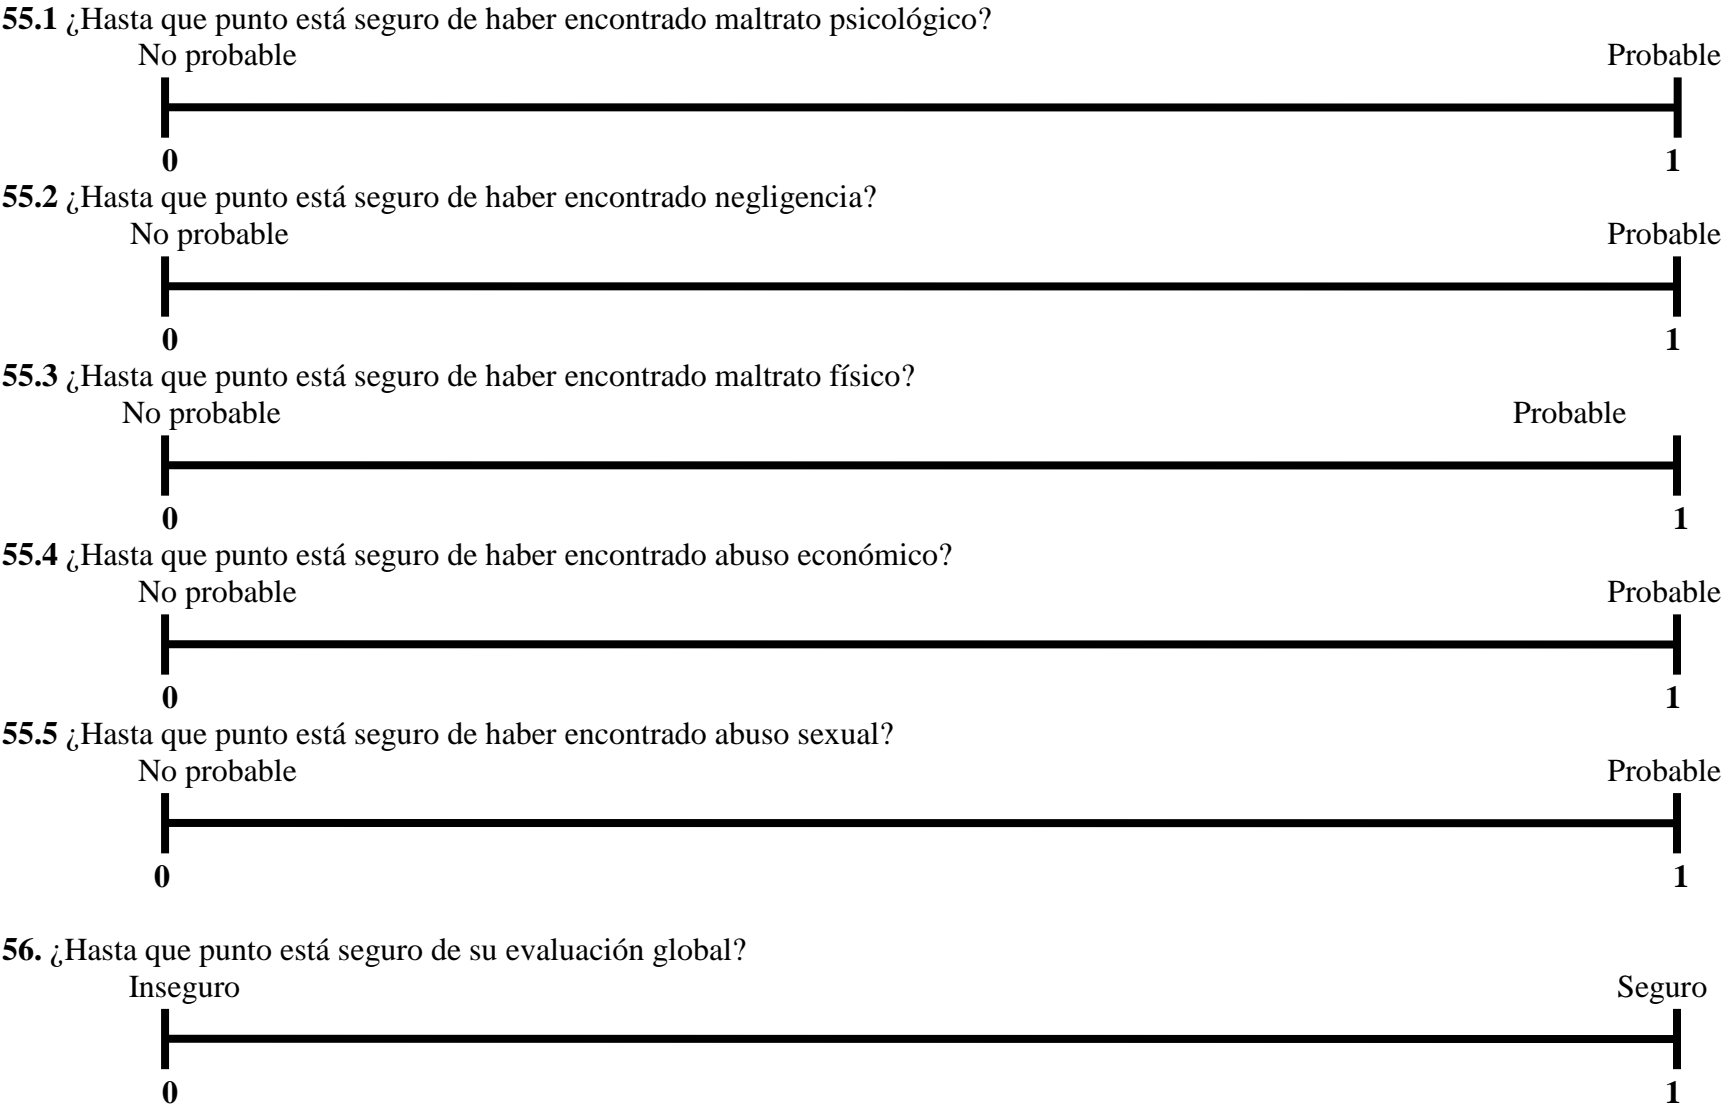

**57. ¿Qué signos y síntomas de maltrato psicológico, físico, económico, negligencia (activa o pasiva) observó?**

En caso de ser aplicable, incluya la explicación:

Maltrato psicológico:

Negligencia:

Maltrato físico:

Abuso económico:

Abuso sexual:

**58.1 ¿La persona mayor ha sido capaz de confirmar si fue físicamente maltratado?**

N/A ☐ ☐ Sí ☐ No ☐ Lo desconozco

Detallar:

**58.2 ¿La persona mayor ha sido capaz de confirmar si fue psicológicamente maltratado?**

N/A ☐ ☐ Sí ☐ No ☐ Lo desconozco

Detallar:

**58.3 ¿La persona mayor ha sido capaz de confirmar si ha sufrido negligencia?**

N/A ☐ ☐ Sí ☐ No ☐ Lo desconozco

Detallar:

**58.4 ¿La persona mayor ha sido capaz de confirmar si ha sufrido abuso económico?**

N/A ☐ ☐ Sí ☐ No ☐ Lo desconozco

Detallar:

**58.5 ¿La persona mayor ha sido capaz de confirmar si ha sufrido abuso sexual?**

N/A ☐ ☐ Sí ☐ No ☐ Lo desconozco

Detallar:

**59. ¿Se encuentra la persona mayor en peligro inminente?**

☐ Sí ☐ No ☐ No aplicable

**60. ¿Necesita o quiere la persona mayor ser derivada para recibir algún tipo de ayuda?**

☐ Sí ☐ No ☐ No aplicable

Comentarios adicionales:

**Firma del evaluador:**

Fecha de finalización de la evaluación escrita ( ):

Duración de la entrevista (horas: minutos):
